# Supplementary figures and images for: Aerodynamic force generation, performance and control of body orientation during gliding in sugar gliders (Petaurus breviceps)
Source: Oxford University Press journal article supplement (doi:10.1242/jeb.002071), 2007-07-20

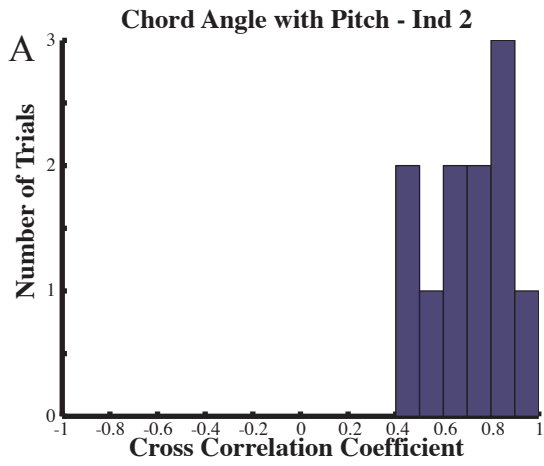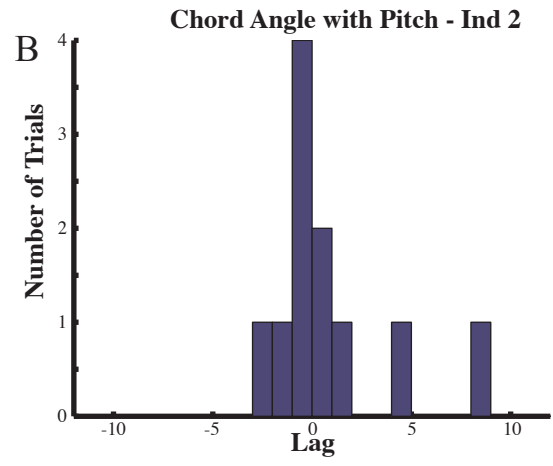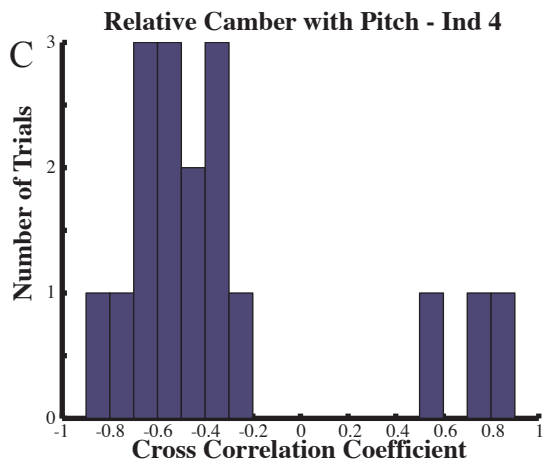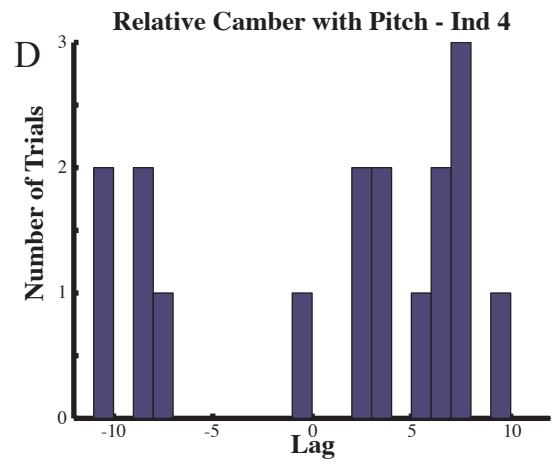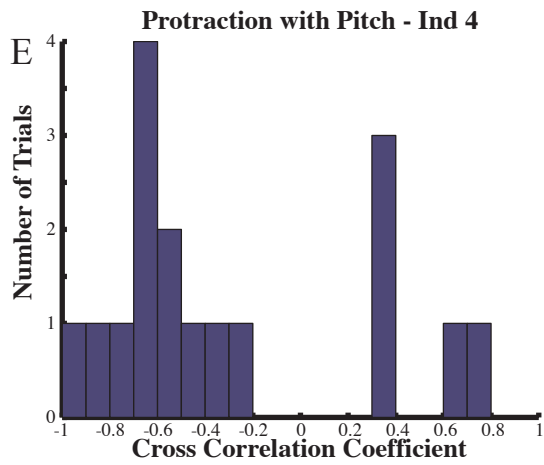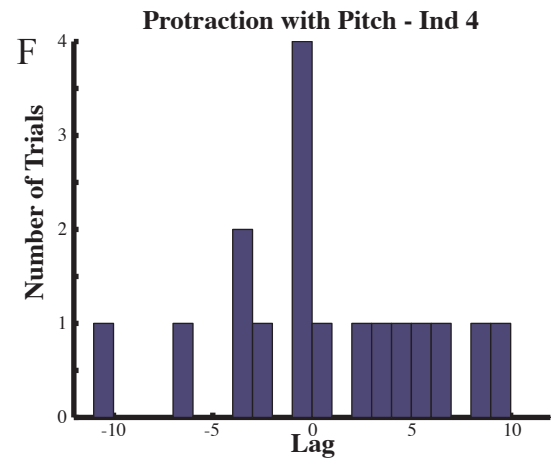

Figure S1

Supplement: jeb002071-sup-002071figs1.pdf [file jeb002071-sup-002071figs1.pdf]

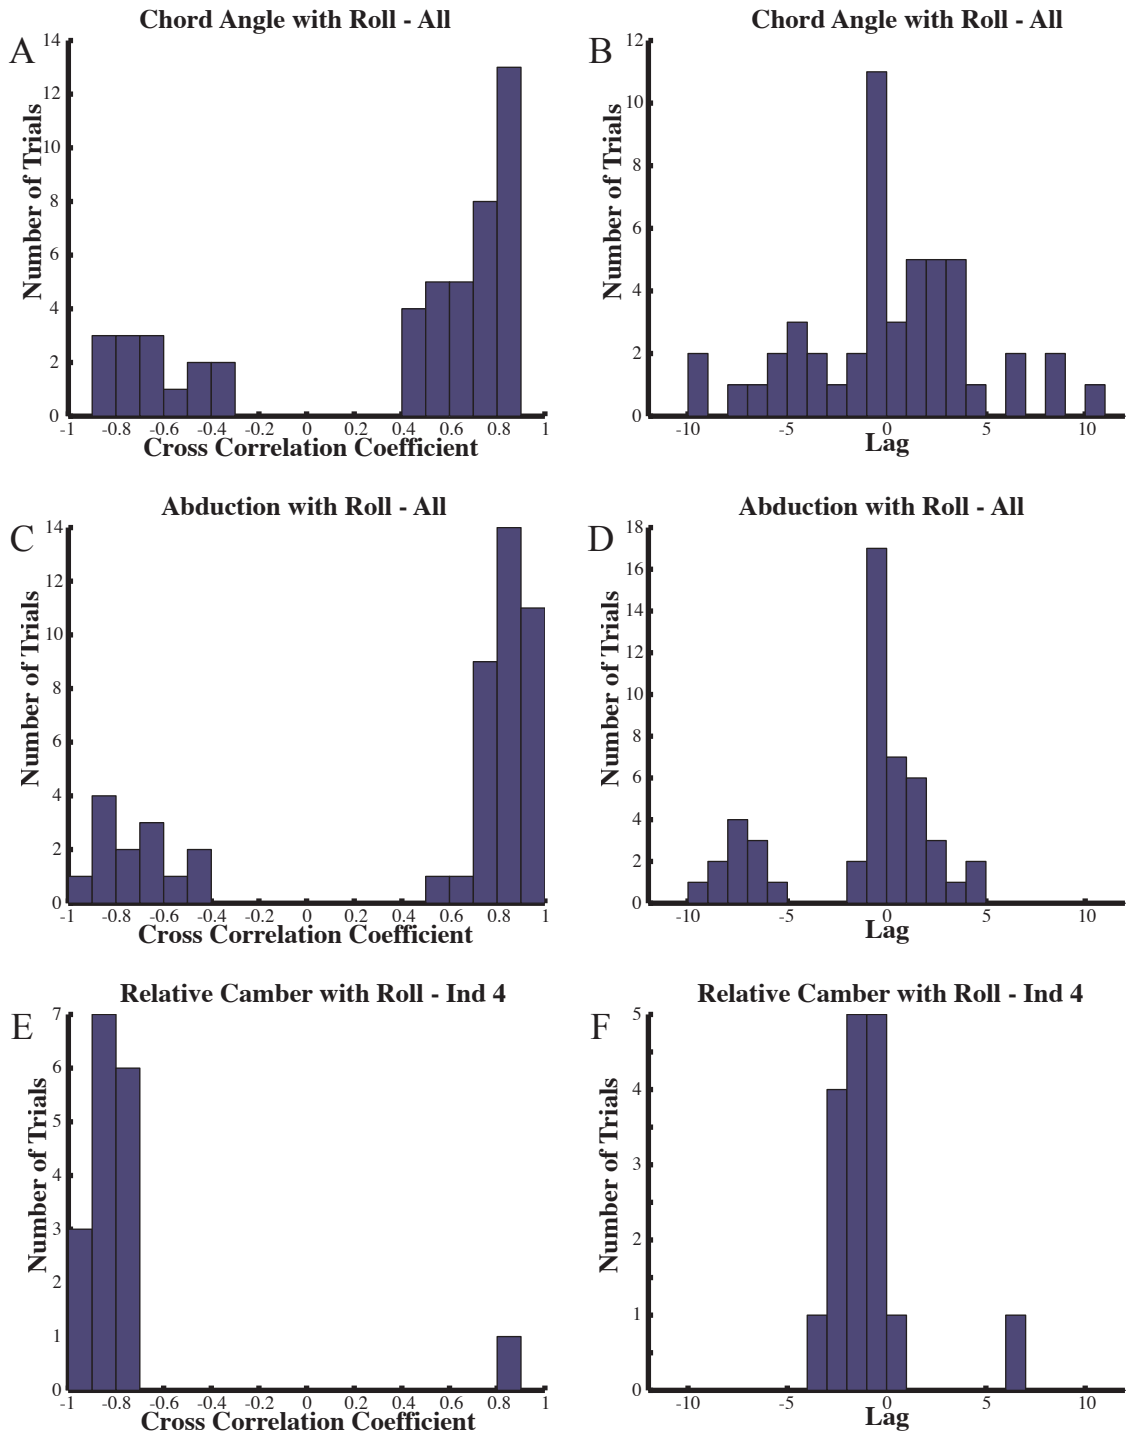

Figure S2

Supplement: jeb002071-sup-002071figs2.pdf [file jeb002071-sup-002071figs2.pdf]

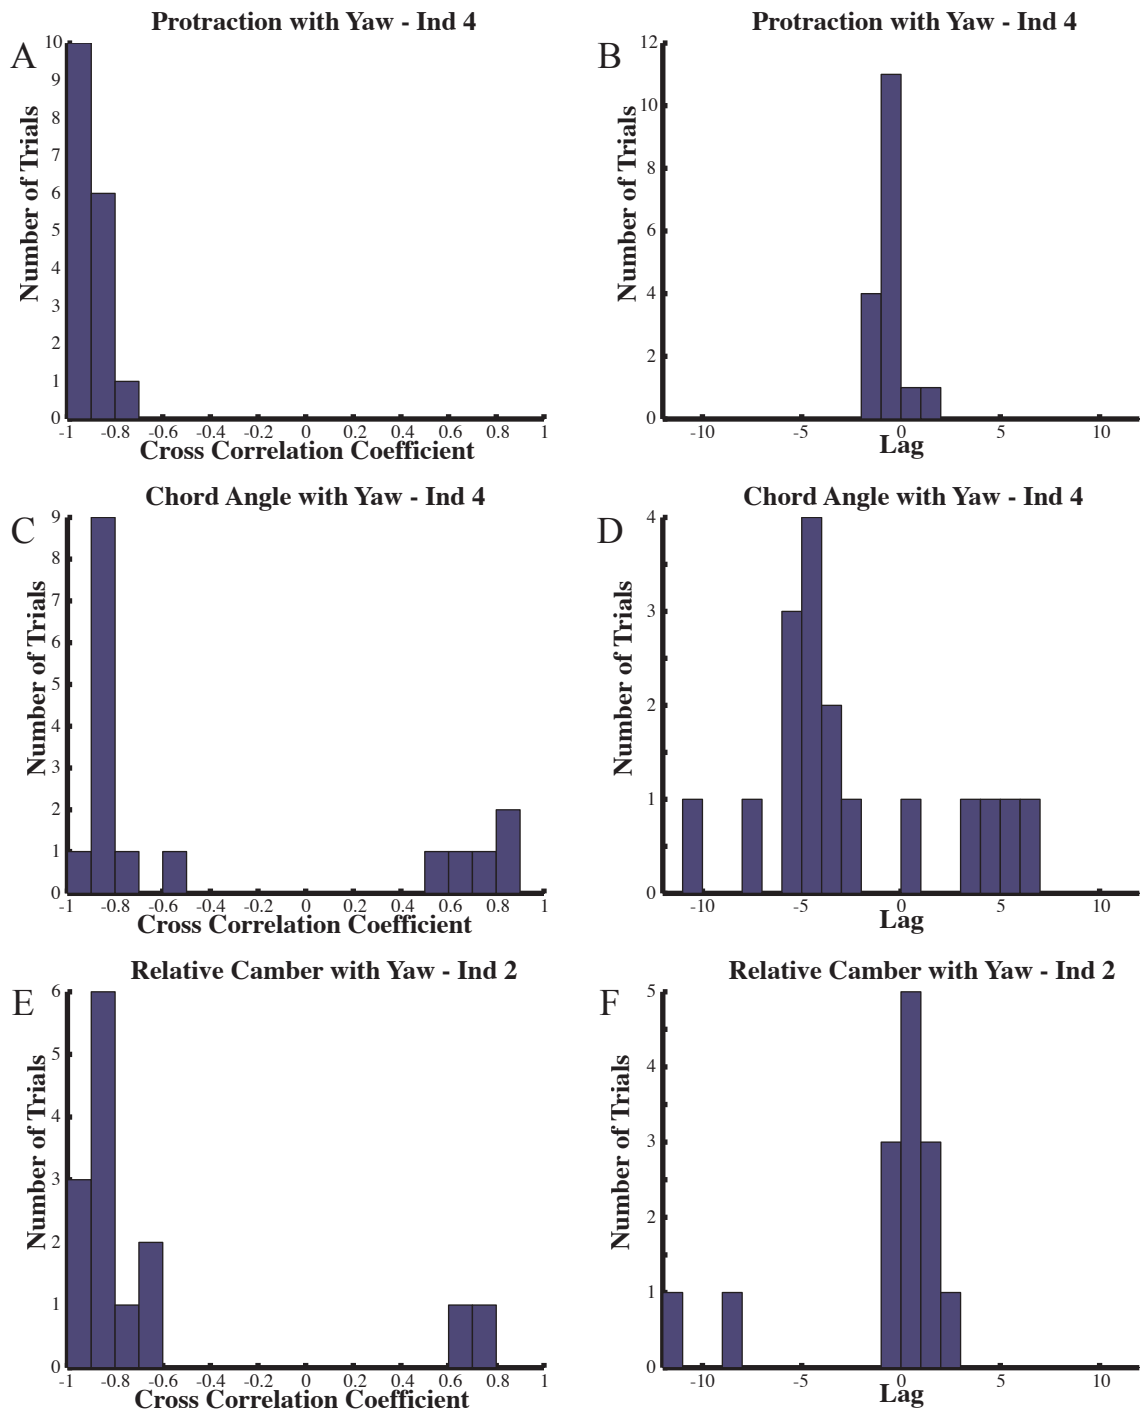

Figure S3

Supplement: jeb002071-sup-002071figs3.pdf [file jeb002071-sup-002071figs3.pdf]
